# 1 Soil stabilisation for DNA metabarcoding of plants and fungi. Implications 2 for sampling at remote locations or via third-parties

3  
4 Lina A Clasen, Andrew P Detheridge, John Scullion & Gareth W Griffith\*  
5 Institute of Biological, Environmental and Rural Sciences, Aberystwyth University, Adeilad Cledwyn,  
6 Penglais, Aberystwyth, Ceredigion SY23 3DD, WALES.

7 \*Correspondence: [gwg@aber.ac.uk](mailto:gwg@aber.ac.uk) (ORCID iD:0000-0001-6914-3745)  
8 [apd06@aber.ac.uk](mailto:apd06@aber.ac.uk) (ORCID iD: 0000-0002-7472-9035); [jos@aber.ac.uk](mailto:jos@aber.ac.uk) (ORCID iD 0000-0002-5225-  
9 8615); [linaclasen@gmail.com](mailto:linaclasen@gmail.com) (ORCID iD:0000-0002-4474-8067)

## 10 11 Abstract

12 Storage of soil samples prior to metagenomic analysis presents a problem. If field sites are remote or  
13 if samples are collected by third parties, transport to analytical laboratories may take several days or  
14 even weeks. The bulk of such samples and requirement for later homogenisation precludes the  
15 convenient use of a stabilisation buffer, so samples are usually cooled or frozen during transit. There  
16 has been limited testing of the most appropriate storage methods for later study of soil organisms  
17 by eDNA approaches. Here we tested a range of storage methods on two contrasting soils,  
18 comparing these methods to the control of freezing at -80°C followed by freeze-drying. To our  
19 knowledge this is the first study to examine the effect of storage conditions on eukaryote DNA in  
20 soil, including both viable organisms (fungi) and DNA contained within dying/dead tissues (plants).  
21 For fungi, the best storage regimes (closest to the control) were storage at 4°C (for up to 14 d) or  
22 active air-drying at room temperature. The worst treatments involved initial freezing followed by  
23 thawing which led to significant later spoilage. The key spoilage organisms were identified as  
24 *Metarhizium carneum* and *Mortierella* spp., with a general increase in saprotrophic fungi and  
25 reduced abundances of mycorrhizal/biotrophic fungi. Plant data showed a similar pattern but with  
26 greater variability in community structure especially in the freeze-thaw treatments, probably due to  
27 stochastic variation in substrates for fungal decomposition, algal proliferation and some seed  
28 germination. In the absence of freeze drying facilities, samples should be shipped refrigerated but  
29 not frozen if there is any risk of thawing.

30  
31 **Keywords:** Freeze-drying; chitinolytic fungi; Freeze-thaw; sample preservation

## 32 33 34 Introduction

35 The use of eDNA metabarcoding (amplicon sequencing) has transformed our knowledge of the  
36 structure and composition of soil biological communities (Geml et al., 2014; Williams, 2020), with  
37 more recent metagenomic studies enhancing our understanding of the metabolic processes  
38 mediated by these organisms (Keepers et al., 2019; Ogwu et al., 2019). However, the methods used  
39 to sample soils (Epp et al., 2012; Lindahl et al., 2013; Taberlet et al., 2012), store and extract total  
40 soil DNA/RNA (Kennedy et al., 2014; Soliman et al., 2017) can exert a strong influence on the data  
41 obtained, as can the barcoding loci/primers and sequencing platforms used. Thus there is a need for  
42 a standard operating procedure (SOP) before metabarcoding analyses conducted in different  
43 laboratories can be compared (Lindahl et al., 2013; Orgiazzi et al., 2015).

44  
45 As the use of eDNA metabarcoding has extended to the study of soils in more remote locations  
46 (Detheridge et al., 2020; Tedersoo et al., 2014) and to more applied deployment in nature  
47 conservation site monitoring by statutory organisations (Detheridge et al., 2018; Geml et al., 2014;  
48 Latch, 2020; Valentin et al., 2020), the issue of soil storage between sampling and subsequent  
49 analysis has become an important consideration. Such concerns have interested soil scientists for  
50 many decades but usually in relation to the metabolic status of soil organisms, assessed via  
51 community level physiological profiles (CLPP), soil respiration etc. (Lee et al., 2007). However, for

52 metabarcoding / metagenomic studies, the preservation of DNA/RNA unchanged from the natural  
53 state presents its own distinctive challenges.

54

55 There are established international guidelines recommending refrigerated storage or freezing  
56 (OECD, 2000) when chemical or microbiological analyses cannot be undertaken on fresh soil.  
57 However, the preservation of soils by air-drying dates back to the origins of soil science and remains  
58 the simplest method for long-term stabilisation. Examination of air-dried soil archive samples dating  
59 back over a century by Clark et al. (2008) found that whilst long-term storage of air-dried soil  
60 reduced the amount of DNA present, differences in bacterial populations according to soil plot  
61 treatment were still detectable.

62

63 Current standards have been established through the International Organization for Standardization  
64 (ISO), for example ISO 11063 (2012) (“Soil quality — Method to directly extract DNA from soil  
65 samples”) and ISO-10381-6 (2002) (“Soil quality—Sampling—Part 6: Guidance on the collection,  
66 handling and storage of soil for the assessment of aerobic microbial processes in the laboratory”).  
67 However, these are focused predominantly on bacteria (Petric et al., 2011), which appear to respond  
68 in storage rather differently from fungi and other groups of biota (Terrat et al., 2015). However, it is  
69 unclear whether this is due to the greater tolerance of bacterial cells to disruption by freezing etc. or  
70 the lower taxonomic resolution of the standard 16S metabarcoding procedures.

71

72 Martí et al. (2012) examined the effects of different soil storage and found that the stability of  
73 bacterial DNA (assessed via DGGE) varied according to soil type. Similarly Lauber et al. (2010), used  
74 DNA metabarcoding of bacterial populations to examine the effects of storage of soil or faeces at a  
75 range of temperatures (-80°C, -20°C, 4°C, 20°C) for 3 or 14 days. Even after 14 d at 20°C (in sealed  
76 container), they found only small changes in bacterial communities. However, Rubin et al. (2013),  
77 also using DNA metabarcoding to assess changes in soil bacterial populations, found that there was a  
78 progressive loss of diversity associated with storage under warmer conditions.

79

80 Freeze drying (with subsequent frozen storage) is widely considered by many to be the best available  
81 option for the stabilisation of soils prior to nucleic acid extraction (Castaño et al., 2016; Straube and  
82 Juen, 2013; Weißbecker et al., 2017). Initial freezing inactivates biological processes and later  
83 removal of water via sublimation at low pressure, stabilises the soil in an inactive dry state.  
84 However, Bainard et al. (2010) found a reduction in arbuscular mycorrhizal fungal DNA in roots  
85 following long-term storage of freeze-dried roots at ambient temperature, so frozen storage  
86 following initial processing is important here too. There are significant additional advantages to  
87 freeze-drying. Freshly-collected soils can be frozen immediately without prior processing and after  
88 freeze-drying stored frozen in a stable state, convenient (unlike directly frozen soil) for later  
89 homogenisation/grinding. The ease with which freeze-dried soils can be finely ground, allows for  
90 efficient homogenisation of larger samples. The latter point is important, since it is crucial that  
91 subsampling for DNA extraction (commonly 200 mg from 500g samples) is representative of the  
92 whole (Lindahl et al., 2013). Repeated DNA extractions from a fully homogenised soil would  
93 therefore result in the same community structure derived from metabarcoding. However,  
94 availability of suitably large freeze-drying capacity can be an important limiting factor at many  
95 institutions.

96

97 Where it is not possible to freeze samples within a few hours of collection, the question remains as  
98 to what pre-treatment is best to preserve the nucleic acids of the soil communities during shipping  
99 from field sites (often sampled by third parties) to analytical labs. Here we compare the effect of  
100 immediate freezing to a range of different soil DNA stabilisation methods, using equipment available  
101 outside laboratories (freezers, fridges, fans and ovens). The resulting effects of these soil storage  
102 methods are examined using eDNA metabarcoding profiles for plants and fungi, hypothesising that

103 inferior storage conditions would lead to: a general loss of diversity in both plants and fungi, due to  
104 DNA degradation; proliferation of a subpopulation of faster-growing fungi, well-suited to growth in  
105 particular storage conditions, which would be associated with greater levels of DNA degradation.

106

## 107 **Methods.**

108 Soil was collected from an upland (grazed) grassland immediately adjacent to the Brignant longterm  
109 grazing experimental field site (lat/long: 52.3648°N, 3.8214°W; 367m asl.). Brignant soil is an acidic  
110 (pH 5) Manod Series (loam over shale Palaeozoic slate, mudstone and siltstone; well-drained fine  
111 loamy or fine silty soils over rock; (Hallett et al., 2017)) with an organic carbon content of 7.3%. Turf  
112 was removed to a depth of 3-5 cm from a single 0.25 m<sup>2</sup> area and approximately 10 kg of soil  
113 collected from the remaining 10 cm depth of topsoil avoiding large stones. A contrasting less acidic  
114 and lower organic matter, alluvial soil type (Conway series O811b [Fluvic Eutric Gleysols]  
115 groundwater gley (silt to silty-clay loam. Depth to gley layer varies @ 10 - 20 cm.)(Hallett et al.,  
116 2017)) pH 6.1, organic carbon 3.6%, was also collected (15 kg) from the edge of an arable field at  
117 Gogerddan (52.4364°N, 4.0313°W; 15 m a.s.l.), with removal of vegetation, as above, and processed  
118 in the same way. The soils were transported within 2 h to the laboratory and sieved (3 mm) to  
119 remove further stones and to enable thorough homogenisation of the soil/roots. Samples of 200 g  
120 were weighed into Ziploc bags (40 in total) and divided into treatments with 4 replicates per  
121 treatment. Bags for the control treatment (Treatment 1) were immediately frozen at -80°C.

122

123 The soil treatments are shown in [Table 1](#). Treatments T2, T3 and T4 were designed to test the effect  
124 of initial freezing followed by thawing during shipping either refrigerated for 14 d (T2) or 5 d (T3), or  
125 stored at ambient temperature (23°C, T4). Treatments T5, T6 and T7 were all dried for 5 d after an  
126 initial “shipping” period (storage for 3d at 4°C). T5 was dried more rapidly by blowing ambient air  
127 into open bags (hairdrier but no heat; as shown in [SuppFig 1](#)), whereas T6 and T7 were passively  
128 dried in open bags at room temperature and 37°C respectively. Treatments T8, T9 and T10 involved  
129 storage in closed bags either at 4°C for 14 d (T8) or at ambient temperature (T9 for 14 d and T10 for  
130 5 d). Five of these 10 treatments (T1, T3, T6, T8 and T9) were also applied to the alluvial soil to see if  
131 a contrasting soil responded to storage in a similar manner.

132

133 **Table 1.** Storage treatments tested in this study using soil adjacent to the Brignant longterm  
134 experiment. An \* indicates treatments also tested with soil from the Gogerddan alluvial plain.

135

136 **SuppData 1.** Photo of the hairdrier apparatus used for active air-drying of soil (treatment T5)

137

138 After the storage treatments were completed, all bags were frozen at -80°C. Samples were then  
139 freeze-dried before sieving at 0.5 mm and thoroughly homogenised according to our standard lab  
140 procedure (Detheridge et al., 2016). DNA was extracted from 200mg of freeze dried soil using the  
141 Power Soil DNA extraction kit (Qiagen), as described by Detheridge et al. (2016). The ITS2 region of  
142 plants and fungi were amplified using a mix of primers. For fungi, the forward primers were those  
143 used by Tedersoo et al. (2014), with an equimolar mix of 6 primers ([SuppData 2](#)). To this mix the  
144 plant primer Chen S2F (ATGCGATACTGGTGTGAAT) (Chen et al., 2010) was added in a ratio of 3  
145 fungal mix to 1 plant primer. This ratio was chosen to ensure that the majority of sequences  
146 returned were fungal as this is the prime aim of the analysis and fungal communities are generally  
147 more complex than plant communities. The reverse primer was the universal ITS4 primer. The  
148 forward primers were linked at the 5' end to the Ion Torrent B adapter sequence  
149 (CCTCTATGGCAGTCGGTGAT). The ITS4 primer was linked at the 5' end to the Ion Torrent A-  
150 adapter sequence (CCATCTCATCCCTGCGTGTCTCCGAC), the TCAG key and an IonXpress Barcode.

151

152 **SuppData 2.** Fungal forward primer sequences with target group to amplify all fungal groups, and  
153 also Stramenopiles (Oomyces) devised by Tedersoo et al. (2014)

154

155 PCR was carried out using PCR Biosystems Ultra polymerase mix (PCR Biosystems Ltd, London UK).  
156 Each reaction contained 250 nM of the forward primer mix and 250 nM of reverse primer.  
157 Amplification conditions were initial denaturing 15 min at 95°C, followed by 30 cycles at 95°C for 30  
158 s, 55°C annealing for 30 s, 72°C extension for 30 s, and a final extension of 5 min at 72°C.

159

160 After PCR, samples were processed, sequenced and sequence data processed as detailed in  
161 Detheridge et al. (2016; 2018; 2020). Fungal sequences were identified using a database build from  
162 v8.0 of UNITE (Abarenkov et al., 2019) and plants sequences using a database built as detailed in  
163 Detheridge et al. (2020). Sequence data have been submitted to the European Nucleotide Archive  
164 with reference number XXXXXXXX. Data were expressed as relative abundance of each of the species  
165 detected (separately for plants and fungi).

166

167 Principal coordinate ordination (PCO) visualised differences in community structure using square  
168 root transformed abundances and a Bray-Curtis distance matrix; these analyses were undertaken in  
169 R (R\_Core\_Team, 2013). PERMANOVA determined whether there were significant differences in  
170 fungal and plant communities between treatments and the pairwise test used to determine which  
171 treatments differed and their degree of separation. An analysis of similarity (SIMPER) was used to  
172 determine which OTUs varied between treatments. These analyses were conducted in PRIMER-  
173 PERMANOVA + v6. ANOVA was used to determine the significance of treatment effects on relative  
174 abundance and these were carried (in R), after any appropriate transformations to meet  
175 requirements of analyses.

176

## 177 **Results**

178 After quality checking there were a total of 2 772 707 ITS2 sequences with a maximum of 94 109  
179 sequences per sample and a minimum of 52 931 (Mean 69 318). After rarefying to the lowest  
180 number of sequences per sample, dropping singleton sequences and trimming 5.8S and 28S regions,  
181 clustering resulted in 848 plant and fungal OTUs for the upland (Brignant) soil and 769 for the alluvial  
182 (Gogerddan) soil.

183

184 Upland (Brignant) soil: Principal coordinate ordinations of the fungal community data (Fig 1 A), show  
185 the clear outlier relative to T1 (control) is T4 (Freeze-thaw, left at 23°C for 14 d), with T2/T3 (Freeze-  
186 thaw, left at 4°C for 5 d/14 d respectively) and T7 (storage at 4°C followed by passive warm air-  
187 drying at 37°C) being the next most divergent treatments. PERMANOVA analyses showed a  
188 significant effect of storage treatment for the fungal community data (Pseudo F = 5.1728 P= 0.001).  
189 Pairwise Permanova comparisons of the fungal populations in each treatment with the control (Fig.  
190 2A) confirm that treatments T2, T3, T4, and T7 had a significant effect on the fungal populations  
191 present at the end of the storage period. However, for the other pre-treatments there were no  
192 significant differences relative to control.

193

194 **Fig. 1.** Principal coordinate diagrams of the fungal community data (A) and plant community data (B)  
195 highlighting the difference in community between the different soil storage treatments. Points show  
196 the mean axis scores and error bars show standard error of the mean.

197

198 **Fig. 2.** Levels of t-statistic from pairwise Permanova of the control treatment compared to all other  
199 treatments. The p value is shown above the bar with significant (P<0.05) values shown in red. (A)  
200 fungal community data (B) plant community data.

201

202 Similar analyses for the effect of different treatments on the plant DNA (including algae:  
203 Chlorophyta) remaining after storage show that the general level of divergence from the control was  
204 less than for fungi but still significant (Permanova Pseudo F = 2.5117 P= 0.001). Here too freeze-thaw

205 treatments were also the most divergent (Fig. 1B, Fig. 2B) and there is similarity in the PCO  
206 ordinations for plant and fungal data. This similarity was corroborated by a Mantel test of the  
207 difference matrices, which revealed a Pearson correlation coefficient of 0.54 ( $P=0.0001$ ). In contrast  
208 to the broader trend, the warm air-drying treatment (T7) had very different effect on the trajectory  
209 of the resulting plant and fungal communities later detected, causing significant change to the fungal  
210 community present (Fig. 2A) but very little effect on the plant DNA later recovered.

211  
212 Apart from the treatments mentioned above, most treatments involving storage of soil at 4°C or at  
213 ambient temperature for up to 14 d did not result in significant changes to the plant or fungal  
214 populations later detected. In PCO ordination, the 4°C for 14 d (T8) treatment was closest to the  
215 control for both plants and fungi (Figs. 1A/1B). For the fungal community data, treatment 10 (closed  
216 bag, ambient temp) in particular showed an increase in the spread of data in both primary axis  
217 dimensions. For plants, in contrast to the fungi, the variance of axis scores (especially PCO1) for most  
218 treatments were larger than for the control treatment (Fig. 1B). This reduces the ability of statistical  
219 analyses to find a significant effect between treatments and may be related to the proliferation of  
220 spoilage fungi during storage.

221  
222 Apart from green algae (Chlorophyta) which comprised <1% of total plant DNA in most treatments,  
223 the plant DNA present in the sieved soils was mainly within dead or dying tissues (e.g. fine roots). In  
224 contrast, a significant component of the fungal community would likely remain viable in the short  
225 term, with some species proliferating if storage conditions are conducive to their growth. Since fungi  
226 are the main decomposers of plant-derived lignocellulose in soil in terrestrial ecosystems, it is likely  
227 that proliferation of certain fungi would be associated with more rapid degradation of plant DNA.  
228 The relative sequence abundance of fungi and plants did significantly vary between treatments (Fig.  
229 3). There were significant increases in the representation of fungi (and thus decrease in plants)  
230 relative to the control (T1), which was higher in two of the freeze-thaw treatments (T2 and T4) and  
231 T9 (23°C for 14 d). The relative proportions of fungi and plant sequences (Fig. 3) is clearly  
232 determined by the the exact mix of plant and fungal primers used but in our experiments the same  
233 mix was used for all samples, and therefore the changes reflect actual patterns of DNA  
234 degradation/proliferation.

235  
236 **Fig. 3. Relative sequence abundance of fungi to plants by treatment. Letters on the bars indicate**  
237 **significant groupings as determined by Tukey's HSD post hoc test and error bars show standard error**  
238 **of the mean.**

239  
240 Some storage treatments led to a reduction in fungal species diversity (SuppData 3A/3B) relative to  
241 control, notably the freeze-thaw treatments (T2, T3, T4) and T7 (warm air-drying). In addition to  
242 significant differences in diversity between treatments, some treatments notably T5, T7 and T10,  
243 showed an increased spread of index values by replicate within treatment, as can be seen by the  
244 larger error bars. For plants (SuppData 3C/3D) reductions in species diversity were less pronounced,  
245 with only T4 differing significantly from control.

246  
247 **SuppData 3. Variations in diversity indices by storage treatment for the upland (Brignant)**  
248 **soil A) Fungi Simpson diversity index B) Fungi Shannon diversity index. C) Plant Simpson**  
249 **diversity index D) Plant Shannon diversity index. Letters above the bars indicate significant**  
250 **groupings as determined by Tukey's HSD post hoc test and error bars show standard error**  
251 **of the mean. Note that Shannon and Simpson indices are scaled inversely (i.e. higher index = lower**  
252 **diversity).**

253  
254 More detailed examination of the differences in the fungal community composition with treatment  
255 reveal a large increase in abundance of Ascomycota relative to Basidiomycota for treatment 4 (Mean

256 2.83) compared to the control treatment (Mean 0.70) with all other treatments remaining very  
257 similar to the control (Fig. 4A). This change was mainly due to the ca. 10-fold (19.4 vs. 1.5%)  
258 increased abundance of the ascomycete *Metarhizium* (formerly *Paecilomyces*) *carneum* (UNITE  
259 species hypothesis SH1552520.08FU) following freeze-thaw and storage for 14d at 23°C (Fig. 4B).  
260 Mortierellomycota showed a similar 8-fold increase relative to control (17.8 vs 2.2%) in the freeze-  
261 thaw treatment stored at 4°C for 14 d and were also more abundant in treatments T4 and T8 (Fig.  
262 4C).

263

264 Analysis of the functional grouping, as determined unambiguously by FUNguild (Nguyen et al., 2016),  
265 revealed that ‘saprotrophic fungi’ demonstrated a similar but less pronounced trend, with a higher  
266 relative abundance in T4 relative to control (22.85% vs. 17.01%) (Fig. 4D). It should be noted that  
267 Mortierellomycota and *Metarhizium* spp. are classed as ‘symbiotroph’ and ‘animal pathogen’  
268 respectively in FUNGuild.

269

270 **Fig. 4. Variations in relative abundance of key fungal groups by storage treatment A) Ratio of**  
271 **Ascomycota to Basidiomycota; B) *Metarhizium carneum*; C) Mortierellomycotina; D) Saprotrophic**  
272 **fungi; E) Glomeromycotina (Arbuscular mycorrhizal fungi); F) Grassland fungi (CHEGD). Letters above**  
273 **the bars indicate significant groupings as determined by Tukey’s HSD post hoc test and error bars**  
274 **show standard error of the mean.**

275

276 As might be expected following disruption of active plant hosts, abundance of arbuscular  
277 mycorrhizal fungi (AMF; subphylum Glomeromycotina) was reduced under the three freeze-thaw  
278 storage conditions, with a 6-fold reduction in T4. Other fungi suspected to be mycorrhizal or with  
279 intricate biotrophic association with higher plants also showed large reductions in abundance,  
280 notably the CHEGD fungi. These fungi, mainly basidiomycetes and comprising members of the  
281 families *Clavariaceae*, *Hygrophoraceae*, *Entolomataceae* and *Geoglossaceae*, are dominant  
282 components of undisturbed grassland habitats. Combined abundance of CHEGD fungi was 5-fold  
283 lower in treatment T4 and also significantly lower in treatments T2, T3 and T7 (Fig. 4D). Analysis of  
284 the individual components of the CHEG fungi revealed that the *Clavariaceae*, *Hygrophoraceae*,  
285 *Geoglossomycetes* varied by treatment with significantly lower relative abundances in treatment T4.  
286 However, there was no significant difference by treatment for *Entolomataceae* (SuppData 4). The  
287 two dominant CHEGD species in the original Brignant soil were *Clavulinopsis laeticolor* (UNITE  
288 SH1611741.08FU) and *Hygrocybe chlorophana* (SH1546991.08FU) with mean abundance in the  
289 control (T1) soil of 21.5% and 9.4% respectively, with these levels being 4-fold and 15-fold lower in  
290 the most unfavourable storage regime (T4; freeze-thaw followed by 14d at 23°C).

291

292 **SuppData 4. Relative abundance of CHEG fungi by storage treatment for upland (Brignant) soil A)**  
293 **Hygrophoraceae B) Clavariaceae. C) Geoglossomycetes D) Entolomataceae. Letters above the bars**  
294 **indicate significant groupings as determined by Tukey’s HSD post hoc test and error bars show**  
295 **standard error of the mean.**

296

297 In the Brignant soil, grasses (Poaceae; 9 spp.) were dominant (mean 88.8% of plant sequences in  
298 control treatment T1) followed by Brassicaceae (*Cardamine pratensis*; 5.57%), Asteraceae (3 spp.;  
299 2.58%) and *Trifolium repens* (Fabaceae; 1.33%), with algae (Chlorophyta) comprising 0.41% of the  
300 plant sequences in the control soil. The turf layer was removed during sample collection, so the  
301 higher plant tissues comprised mainly (live or dead) root tissues. Several species (e.g. *Crepis*  
302 *capillaris*, *Hypochaeris radicata*, *Ranunculus repens*, *Cerastium glomeratum*) were detected in three  
303 or fewer of the initial 40 sieved soil samples, probably due to heterogeneous distribution of larger  
304 pieces of taproot tissue. The abundance of Poaceae varied by treatment (Suppdata 5) but this  
305 variation was not significant because of the broad range of data in some treatment replicates (e.g.  
306 3.7% to 68.2% in treatment 4). The greatest treatment effect on plant populations was the ca. 20-

307 fold increase in abundance of Chlorophyta in T4, likely due to tolerance of these microbes to freezing  
308 and later proliferation inside the clear plastic bags when incubated under ambient indoor lighting.

309

310 **Suppdata 5. Relative sequence abundance of most abundant plant orders. Error bars show standard**  
311 **error of the mean.**

312

313 Alluvial (Gogerddan) soil: A subset of the storage treatments (T1, T3, T6, T8, T9) were applied to a  
314 contrasting soil type from an arable field in Gogerddan. The organic matter content of this soil was  
315 much lower (3.6% vs 7.3%) and initial plant and fungal populations of the original soils were very  
316 different. For example, Ascomycota fungi comprised ca. 70% of the initial fungal population at  
317 Gogerddan (vs 37% at Brignant), mostly due to the much lower abundance of CHEGD fungi (16% vs  
318 41%, with Hygrophoraceae absent).

319

320 As with the Brignant soils, freeze-thaw storage (T3; freeze-thaw followed by 5 d at 23°C) resulted in  
321 the greatest difference in fungal populations relative to control (Fig. 5A), with a reduction in diversity  
322 (Suppdata 6A,6B) compared to control and the other treatments. The pattern of divergence of plant  
323 DNA composition followed a similar pattern to the fungi (Fig. 5B) but with no significant decrease in  
324 diversity indices (Suppdata 6C,6D). The most divergent treatment was storage at 23°C for 14 d (T9)  
325 which, in contrast with the other findings, showed higher diversity compared to the control but not  
326 the other treatments (Suppdata 6D).

327

328 **Fig. 5. Principal coordinate diagrams of the fungal community data (A) and plant community data (B)**  
329 **in Gogerddan soil, highlighting the difference in community between the different soil storage**  
330 **treatments. Points show the mean axis scores and error bars indicate standard error of the mean.**  
331 **The control (immediate freezing at -80°C) is indicated with black arrow.**

332

333 **SuppData 6. Variations in diversity indices by storage treatment for the alluvial (Gogerddan) soil A)**  
334 **Fungi Simpson diversity index B) Fungi Shannon diversity index. C) Plant Simpson diversity index D)**  
335 **Plant Shannon diversity index. Letters above the bars indicate significant groupings as determined by**  
336 **Tukey's HSD post hoc test and error bars show standard error of the mean. NS indicates no**  
337 **significant treatment effect. Note that Shannon and Simpson indices are scaled inversely (i.e. higher**  
338 **index = lower diversity).**

339

340 In contrast to the Brignant soil, the relative abundance of Ascomycota:Basidiomycota did not  
341 increase following freeze-thaw storage (Suppdata 7), in large part because the dominant ascomycete  
342 at Gogerddan (*Chaetothyriales\_sp:SH1512803.08FU* accounting for 21% of all fungal sequences in  
343 T1) was 4-fold lower in T3 and several basidiomycetous soil yeasts (e.g. *Solicoccozyma* spp.)  
344 increased several fold in abundance. In both the Gogerddan and Brignant soils, mycorrhizal fungi  
345 (AMF) declined in abundance following freeze-thaw treatment and fungi categorised as saprotrophic  
346 in FUNguild exhibited a 2-fold increase relative to control. *Metarhizium carneum* and  
347 Mortierellomycota (mainly *Mortierella elongata*) both increased 2-fold in abundance following  
348 freeze-thaw storage, as was found with the Brignant soil.

349

350 **SuppData 7. Relative abundance of fungal groups by storage treatment for the alluvial soil**  
351 **(Gogerddan) A) Ascomycota to Basidiomycota ratio; B) *Metarhizium carneum*; C) Mortierellomycota;**  
352 **D) Saprotrophic fungi; E) Glomeromycotina (Arbuscular mycorrhizal fungi); F) Grassland fungi**  
353 **(CHEGD). Letters above the bars indicate significant groupings as determined by Tukey's HSD post**  
354 **hoc test and error bars show standard error of the mean.**

355

356 The plant community was also less diverse in the alluvial soil, with *Ranunculus bulbosus* (36.9%), the  
357 chlorophyte *Coelastrella* sp. (22.4%), *Holcus lanatus* (7.4%) and *Polygonum aviculare* (5.7%) found as

358 the dominant plant species. Plant sequences comprised 14%-42% of all the sequences retrieved  
359 suggesting a similar ratio of plant to fungal biomass to that found in the Brignant soil, although with  
360 a greater abundance of Chlorophyta. The dominant chlorophyte, *Coelastrella sp.*, is a ubiquitous  
361 species found in many substrates, including soils, worldwide (Wang et al., 2019). As with the  
362 Brignant soil, plant community data increased in variation with treatment especially after freeze  
363 thaw (T3) and longer storage at 4°C (T8) and room temperature (T9) (Fig. 5). As also observed for the  
364 Brignant soil, all treatments showed greater variability in plant community than the control (Fig. 5B-  
365 error bars), suggesting that DNA degradation was occurring and that this was due to the treatment  
366 effects rather than any initial inter-replicate variability. Seed germination was observed in some  
367 samples stored at room temperature (T9) and this may have contributed to this variability.

368

## 369 Discussion

370 In this investigation we have tested the effectiveness of different soil storage conditions in stabilising  
371 fungal and plant DNA prior to later storage (-80°C) and DNA extraction. This is a concern for soil  
372 ecologists, since transport from remote and field sites to research laboratories requires interim  
373 storage in transit. This may also be a concern where soil sampling is undertaken by third parties and  
374 require transport by mail or courier. For example, the authors recently studied the soils of endemic  
375 woodlands in St. Helena and transport of samples to Wales involved storage of the samples for up to  
376 8 d at 4°C in sealed plastic bags (Detheridge et al., 2020). On other occasions we receive samples  
377 from third party collaborators who may send soil samples in batches with delays of up to a week  
378 between collection and final frozen storage.

379

380 The data presented here shows clearly that refrigerated storage for up to 14 d (T8) prior to frozen  
381 storage at -80°C has little effect on the fungal or plant DNA later extracted. In contrast, samples  
382 initially frozen but allowed to thaw show the most rapid deterioration, presumably due to initial ice-  
383 damage from freezing and subsequent enzymatic degradation of DNA.

384

385 Air-drying (sometimes with the aid of silica gel) is widely used in botanical fieldwork for preservation  
386 of plant tissues (Chase and Hills, 1991; Liston et al., 1990) and has been shown to be superior to  
387 other methods for many (Pyle and Adams, 1989) but not all (Thomson, 2002) species. For the  
388 preservation of plant DNA in soil, this method was also highly effective, more so with passive, warm  
389 (T7) than active ambient air-drying (T5) (Fig. 1B). However, warm (37°C) air-drying caused large  
390 changes to fungal communities, presumably due to degradation of the DNA of certain fungi, notably  
391 CHEGD fungi (Fig. 4F). Relative to other groups of biota, fungi are heat-sensitive and only a few  
392 species can grow at 37°C (Robert et al., 2015) and no such effect was apparent with ambient air-  
393 drying. Mean relative abundance of saprotrophic fungi was greater for both air-dry treatments than  
394 in the control (Fig. 4D) but there was no significant treatment effect.

395

396 A few fungi were observed to increase in abundance under some storage treatments, presumably  
397 because the storage conditions were conducive to their growth. *Metarhizium* (formerly  
398 *Paecilomyces*) *carneum* (Kepler et al., 2014) showing the greatest increase in abundance, notably in  
399 the freeze-thawed soils which were then incubated at ambient temperature (Fig. 4C). This species is  
400 strongly chitinolytic and was frequently recovered from soil baited with chitin (Gray and Baxby,  
401 1968; Jackson, 1965). Another closely related species, *Metarhizium marquandii* (Inglis and Tigano,  
402 2006), showed the same patterns of relative abundance but was present at lower levels. Both these  
403 species are entomopathogenic to Lepidoptera (Bakeri et al., 2009; Magda and Said, 2014; Shin et al.,  
404 2013). However, in this experiment the soils were sieved did not have a high content of soil fauna  
405 and it is likely that proliferation of *M. carneum* was due to its ability to degrade the cell walls of  
406 recently dead fungi (e.g CHEGD fungi and AMF).

407



408 Of the 15 *Mortierella* spp. detected within the Brignant soil, all but one increased in abundance in  
409 the freeze-thawed soil incubated at 4°C (Fig. 4C). *Mortierella* spp. are psychro-tolerant (Melo et al.,  
410 2014; Widden, 1987), exhibit ice nucleation activity (Fröhlich-Nowoisky et al., 2015) and are  
411 abundant in recently thawed glacier forefront soils (Dresch et al., 2019). As has been found for  
412 *Metarhizium* spp., *Mortierella* spp. are also chitinolytic and frequently isolated in soil baiting  
413 experiments with chitin (Gray and Baxby, 1968; Jackson, 1965). *Mortierella alpina*, the most  
414 abundant *Mortierella* species found here is also reported to be parasitic on soil fungi (*Rhizoctonia*  
415 spp.) and nematodes (Al-Shammari et al., 2013), as well as occurring as endophytes of plant roots  
416 (Bonfante, 2020). Thus, it is likely that, like *M. carneum*, the *Mortierella* spp. benefit from the  
417 increased abundance dead hyphae (AMF/ CHEGD etc.) and are able to exploit these at low  
418 temperature. Mortierellomycotina (all *Mortierella* spp.) were also elevated 4-fold in soil stored at  
419 4°C for 14 d (T8), the treatment least changed from the control. Thus the presence of elevated  
420 populations of these fungi provides a useful indication that soils have potentially been stored sub-  
421 optimally. Also highly elevated (10-fold) in freeze-thawed soils was *Myxotrixchum* (anamorph is  
422 *Oidiodendron*); members of this genus are also most commonly encountered in boreal soils rich in  
423 organic matter (Rice and Currah, 2005).

424  
425 Of the taxa which declined substantially following freeze-thawing, Glomeromycotina (AMF) showed  
426 the greatest decline. However, within this subphylum some taxa were more heavily affected than  
427 others. For instance, *Acaulospora* sp. showed a >4-fold decline (treatments T2 and T4), whereas  
428 *Claroideoglossum* spp. declined less than 2-fold. This is consistent with the findings of Klironomos et  
429 al. (2001) who found *Claroideoglossum* to be tolerant of freeze-thaw cycles compared to other AMF  
430 spp.

431  
432 The CHEGD fungi (barring Entolomataceae) also showed substantial decline in relative abundance in  
433 freeze-thaw treatments. Like AMF, these fungi are obligate root-associated biotrophs (Halbwachs et  
434 al., 2013; Halbwachs et al., 2018), and are negatively affected by killing of host vegetation (Griffith et  
435 al., 2014). the fact that Entolomataceae were differently affected to other CHEGD fungi suggests that  
436 they are nutritionally more flexible, potentially with some saprotrophic ability. Together the CHEGD  
437 fungi comprised >40% of the total fungal biomass at the Brignant site and are recognized to be the  
438 dominant fungi of undisturbed mesotrophic grasslands (Griffith et al., 2019; Halbwachs et al., 2013).  
439 Their susceptibility to freeze-thaw treatment and resultant increase in fungal necromass is likely the  
440 cause of the large proliferation of the chitinolytic *M. carneum* and *Mortierella* spp. in freeze-thaw  
441 treatments.

## 442 443 **Conclusions**

444 To our knowledge this is the only study to have examined the effects of sub-optimal soil storage on  
445 eukaryotic eDNA using a high resolution method. When analysing fungal communities, for those  
446 situations where freezing samples and freeze drying are impractical, such as remote locations  
447 without equipment and requiring length shipping times, the analysis indicates that the best options  
448 available are to ship cold or, if impractical, to air dry at room temperature prior to shipping. Air  
449 drying can be enhanced by using an unheated active air source, such as a blower or a fan. Pre-  
450 freezing a sample prior to shipping is not recommended, nor is drying with a heat source such as a  
451 drying oven. For two contrasting soil types, the results of suboptimal storage were similar,  
452 suggesting broad applicability of these guidelines.

## 453 454 **Acknowledgements**

455 This was supported by a grant to GWG, APD, LAC and JS from Welsh Assembly Government  
456 (Contract C343/2017/2108; “Higher Plant DNA Sequencing in Soil” via David Rogerson and  
457 Geraint Lewis), and capacity developed as part of the Welsh European Funding Office Flexis

458 West project C80835 (APD and JS). The Institute of Biological, Environmental, and Rural  
459 Sciences receives strategic funding from the BBSRC.

460

#### 461 **Author's contribution**

462 GWG, JS, APD conceived the study. Experiments were undertaken by LAC and APD.  
463 Manuscript was drafted by GWG/APD and all authors contributed to editing of the  
464 manuscript.

#### 465 **References**

- 466 Abarenkov, K., Zirk, A., Piirmann, T., Pöhönen, R., Ivanov, F., Nilsson, R.H., Kõljalg, U., 2019. Full  
467 mothur UNITE+INSD dataset 1. Version 02.02.2019.
- 468 Al-Shammari, T.A., Bahkali, A.H., Elgorban, A.M., El-Kahky, M.T., Al-Sum, B.A., 2013. The use of  
469 *Trichoderma longibrachiatum* and *Mortierella alpina* against root-knot nematode, *Meloidogyne*  
470 *javanica* on tomato. *Journal of Pure and Applied Microbiology* 7, 199-207.
- 471 Bainard, L.D., Klironomos, J.N., Hart, M.M., 2010. Differential effect of sample preservation methods  
472 on plant and arbuscular mycorrhizal fungal DNA. *Journal of Microbiological Methods* 82, 124-  
473 130.
- 474 Bakeri, S.A., Ali, S.R.A., Tajuddin, N.S., Kamaruzzaman, N.E., 2009. Efficacy of entomopathogenic  
475 fungi, *Paecilomyces* spp., in controlling the oil palm bagworm, *Pteroma pendula* (Joannis).  
476 *Journal of Oil Palm Research* 21, 693-699.
- 477 Bonfante, P., 2020. Mucoromycota: going to the roots of plant-interacting fungi. *Fungal Biology*  
478 *Reviews*.
- 479 Castaño, C., Parladé, J., Pera, J., De Aragón, J.M., Alday, J.G., Bonet, J.A., 2016. Soil drying procedure  
480 affects the DNA quantification of *Lactarius vinosus* but does not change the fungal community  
481 composition. *Mycorrhiza* 26, 799-808.
- 482 Clark, I.M., Hirsch, P.R., 2008. Survival of bacterial DNA and culturable bacteria in archived soils from  
483 the Rothamsted Broadbalk experiment. *Soil Biology and Biochemistry* 40, 1090-1102.
- 484 Chase, M.W., Hills, H.H., 1991. Silica gel: an ideal material for field preservation of leaf samples for  
485 DNA studies. *Taxon* 40, 215-220.
- 486 Chen, S., Yao, H., Han, J., Liu, C., Song, J., Shi, L., Zhu, Y., Ma, X., Gao, T., Pang, X., Luo, K., Li, Y., Li, X.,  
487 Jia, X., Lin, Y., Leon, C., 2010. Validation of the ITS2 Region as a Novel DNA Barcode for  
488 Identifying Medicinal Plant Species. *PLOS ONE* 5, e8613.
- 489 Detheridge, A.P., Brand, G., Fychan, R., Crotty, F.V., Sanderson, R., Griffith, G.W., Marley, C.L., 2016.  
490 The legacy effect of cover crops on soil fungal populations in a cereal rotation. *Agriculture,*  
491 *Ecosystems & Environment* 228, 49-61.
- 492 Detheridge, A.P., Comont, D., Callaghan, T.M., Bussell, J., Brand, G., Gwynn-Jones, D., Scullion, J.,  
493 Griffith, G.W., 2018. Vegetation and edaphic factors influence rapid establishment of distinct  
494 fungal communities on former coal-spoil sites. *Fungal Ecology* 33, 92-103.
- 495 Detheridge, A.P., Cherrett, S., Clasen, L.A., Medcalf, K., Pike, S., Griffith, G.W., Scullion, J., 2020.  
496 Depauperate soil fungal populations from the St. Helena endemic *Commidendum robustum* are  
497 dominated by Capnodiales. *Fungal Ecology* 45, 100911.
- 498 Dresch, P., Falbesoner, J., Ennemoser, C., Hittorf, M., Kuhnert, R., Peintner, U., 2019. Emerging from  
499 the ice-fungal communities are diverse and dynamic in earliest soil developmental stages of a  
500 receding glacier. *Environmental Microbiology* 21, 1864-1880.
- 501 Epp, L.S., Boessenkool, S., Bellemain, E.P., Haile, J., Esposito, A., Riaz, T., Erseus, C., Gusarov, V.I.,  
502 Edwards, M.E., Johnsen, A., 2012. New environmental metabarcodes for analysing soil DNA:  
503 potential for studying past and present ecosystems. *Molecular Ecology* 21, 1821-1833.
- 504 Fröhlich-Nowoisky, J., Hill, T.C., Pummer, B.G., Yordanova, P., Franc, G.D., Pöschl, U., 2015. Ice  
505 nucleation activity in the widespread soil fungus *Mortierella alpina*. *Biogeosciences* 12, 1057-  
506 1071.

- 507 Geml, J., Gravendeel, B., van der Gaag, K.J., Neilen, M., Lammers, Y., Raes, N., Semenova, T.A., de  
508 Knijff, P., Noordeloos, M.E., 2014. The contribution of DNA metabarcoding to fungal  
509 conservation: Diversity assessment, habitat partitioning and mapping Red-Listed fungi in  
510 protected coastal *Salix repens* communities in the Netherlands. PLOS ONE 9, e99852.
- 511 Gray, T., Baxby, P., 1968. Chitin decomposition in soil: II. The ecology of chitinoclastic micro-  
512 organisms in forest soil. Transactions of the British Mycological Society 51, 293-309.
- 513 Griffith, G.W., Cavalli, O., Detheridge, A.P., 2019. An assessment of the fungal conservation value of  
514 Hardcastle Crags using NextGen DNA sequencing (NECR258). Natural England Commissioned  
515 Report NECR258 (<http://publications.naturalengland.org.uk/publication/4543317115404288>).
- 516 Griffith, G.W., Graham, A., Woods, R.G., Easton, G.L., Halbwachs, H., 2014. Effect of biocides on the  
517 fruiting of waxcap fungi. Fungal Ecology 7, 67-69.
- 518 Nguyen, N.H., Song, Z., Bates, S.T., Branco, S., Tedersoo, L., Menke, J., Schilling, J.S., Kennedy, P.G.,  
519 2016. FUNGuild: an open annotation tool for parsing fungal community datasets by ecological  
520 guild. Fungal Ecology 20, 241-248.
- 521 Halbwachs, H., Dentinger, B.T.M., Detheridge, A.P., Karasch, P., Griffith, G.W., 2013. Hyphae of  
522 waxcap fungi colonise plant roots. Fungal Ecology 6, 487-492.
- 523 Halbwachs, H., Easton, G.L., Bol, R., Hobbie, E.A., Garnett, M.H., Peršoh, D., Dixon, L., Ostle, N.,  
524 Karasch, P., Griffith, G.W., 2018. Isotopic evidence of biotrophy and unusual nitrogen nutrition in  
525 soil-dwelling Hygrophoraceae. Environmental Microbiology 20, 3573-3588.
- 526 Hallett, S.H., Sakrabani, R., Keay, C., Hannam, J.A., 2017. Developments in land information systems:  
527 examples demonstrating land resource management capabilities and options. Soil Use and  
528 Management 33, 514-529.
- 529 Inglis, P.W., Tigano, M.S., 2006. Identification and taxonomy of some entomopathogenic  
530 *Paecilomyces* spp.(Ascomycota) isolates using rDNA-ITS sequences. Genetics and Molecular  
531 Biology 29, 132-136.
- 532 ISO-11063, 2012. Soil quality — Method to directly extract DNA from soil samples. International  
533 Organization for Standardization (ISO). <https://www.iso.org/obp/ui/#iso:std:iso:11063:ed-1:v1:en>.
- 534
- 535 ISO-18400-206, 2002. Soil quality — Sampling — Part 206: Collection, handling and storage of soil  
536 under aerobic conditions for the assessment of microbiological processes, biomass and diversity  
537 in the laboratory. International Organization for Standardization (ISO).  
538 <https://www.iso.org/standard/68249.html>.
- 539 Jackson, R., 1965. Studies of fungi in pasture soils: III. Physiological studies on some fungal isolates  
540 from the root surface and from organic debris. New Zealand Journal of Agricultural Research 8,  
541 878-888.
- 542 Keepers, K.G., Pogoda, C.S., White, K.H., Anderson Stewart, C.R., Hoffman, J.M., Ruiz, A.M., McCain,  
543 C.M., Lendemer, J.C., Kane, N.C., Tripp, E.A., 2019. Whole genome shotgun sequencing detects  
544 greater lichen fungal diversity than amplicon-based methods in environmental samples.  
545 Frontiers in Ecology and Evolution 7, 484.
- 546 Kennedy, N.A., Walker, A.W., Berry, S.H., Duncan, S.H., Farquarson, F.M., Louis, P., Thomson, J.M.,  
547 2014. The impact of different DNA extraction kits and laboratories upon the assessment of  
548 human gut microbiota composition by 16S rRNA gene sequencing. PloS one 9.
- 549 Kepler, R.M., Humber, R.A., Bischoff, J.F., Rehner, S.A., 2014. Clarification of generic and species  
550 boundaries for *Metarhizium* and related fungi through multigene phylogenetics. Mycologia 106,  
551 811-829.
- 552 Klironomos, J.N., Hart, M.M., Gurney, J.E., Moutoglis, P., 2001. Interspecific differences in the  
553 tolerance of arbuscular mycorrhizal fungi to freezing and drying. Canadian Journal of Botany 79,  
554 1161-1166.
- 555 Latch, E.K., 2020. Integrating genomics into conservation management. Molecular Ecology Resources  
556 20, doi: 10.1111/1755-0998.13188.

- 557 Lauber, C.L., Zhou, N., Gordon, J.I., Knight, R., Fierer, N., 2010. Effect of storage conditions on the  
558 assessment of bacterial community structure in soil and human-associated samples. *FEMS*  
559 *Microbiology Letters* 307, 80-86.
- 560 Lee, Y.B., Lorenz, N., Dick, L.K., Dick, R.P., 2007. Cold storage and pretreatment incubation effects on  
561 soil microbial properties. *Soil Science Society of America Journal* 71, 1299-1305.
- 562 Lindahl, B.D., Nilsson, R.H., Tedersoo, L., Abarenkov, K., Carlsen, T., Kjølter, R., Kõljalg, U., Pennanen,  
563 T., Rosendahl, S., Stenlid, J., 2013. Fungal community analysis by high-throughput sequencing of  
564 amplified markers—a user's guide. *New Phytologist* 199, 288-299.
- 565 Liston, A., Rieseberg, L.H., Adams, R.P., Do, N., Ge-lin, Z., 1990. A method for collecting dried plant  
566 specimens for DNA and isozyme analyses, and the results of a field test in Xinjiang, China. *Annals*  
567 *of the Missouri Botanical Garden* 77, 859-863.
- 568 Magda, S., Said, S., 2014. Efficacy of two entomopathogenic fungi against corn pests under  
569 laboratory and field conditions in Egypt. *European Journal of Academic Essays* 1, 1-6.
- 570 Martí, E., Càliz, J., Montserrat, G., Garau, M.A., Cruañas, R., Vila, X., Sierra, J., 2012. Air-drying,  
571 cooling and freezing for soil sample storage affects the activity and the microbial communities  
572 from two Mediterranean soils. *Geomicrobiology Journal* 29, 151-160.
- 573 Melo, I.S., Santos, S.N., Rosa, L.H., Parma, M.M., Silva, L.J., Queiroz, S.C., Pellizari, V.H., 2014.  
574 Isolation and biological activities of an endophytic *Mortierella alpina* strain from the Antarctic  
575 moss *Schistidium antarctici*. *Extremophiles* 18, 15-23.
- 576 OECD, 2000. OECD Guidelines for the Testing Of Chemicals. Test No. 217: Soil Microorganisms:  
577 Carbon Transformation Test (doi.org/10.1787/20745761), Paris.
- 578 Ogwu, M.C., Kerfahi, D., Song, H., Dong, K., Seo, H., Lim, S., Srinivasan, S., Kim, M.K., Waldman, B.,  
579 Adams, J.M., 2019. Changes in soil taxonomic and functional diversity resulting from gamma  
580 irradiation. *Scientific Reports* 9, 1-13.
- 581 Orgiazzi, A., Dunbar, M.B., Panagos, P., de Groot, G.A., Lemanceau, P., 2015. Soil biodiversity and  
582 DNA barcodes: opportunities and challenges. *Soil Biology and Biochemistry* 80, 244-250.
- 583 Petric, I., Philippot, L., Abbate, C., Bispo, A., Chesnot, T., Hallin, S., Laval, K., Lebeau, T., Lemanceau,  
584 P., Leyval, C., 2011. Inter-laboratory evaluation of the ISO standard 11063 “Soil quality—Method  
585 to directly extract DNA from soil samples”. *Journal of Microbiological Methods* 84, 454-460.
- 586 Pyle, M.M., Adams, R.P., 1989. In situ preservation of DNA in plant specimens. *Taxon* 38, 576-581.
- 587 R\_Core\_Team, 2013. R: A language and environment for statistical computing. R Foundation for  
588 Statistical Computing, Vienna, Austria (URL <http://www.R-project.org/>).
- 589 Rice, A.V., Currah, R.S., 2005. *Oidiodendron*: A survey of the named species and related anamorphs  
590 of *Myxotrichum*. *Studies in Mycology* 53, 83-120.
- 591 Robert, V., Cardinali, G., Casadevall, A., 2015. Distribution and impact of yeast thermal tolerance  
592 permissive for mammalian infection. *BMC biology* 13, 18.
- 593 Rubin, B.E., Gibbons, S.M., Kennedy, S., Hampton-Marcell, J., Owens, S., Gilbert, J.A., 2013.  
594 Investigating the impact of storage conditions on microbial community composition in soil  
595 samples. *PloS One* 8, e70460.
- 596 Shin, T.Y., Lee, W.W., Ko, S.H., Choi, J.B., Bae, S.M., Choi, J.Y., Lee, K.S., Je, Y.H., Jin, B.R., Woo, S.D.,  
597 2013. Distribution and characterisation of entomopathogenic fungi from Korean soils. *Biocontrol*  
598 *Science and Technology* 23, 288-304.
- 599 Soliman, T., Yang, S.-Y., Yamazaki, T., Jenke-Kodama, H., 2017. Profiling soil microbial communities  
600 with next-generation sequencing: the influence of DNA kit selection and technician technical  
601 expertise. *PeerJ* 5, e4178.
- 602 Straube, D., Juen, A., 2013. Storage and shipping of tissue samples for DNA analyses: A case study on  
603 earthworms. *European Journal of Soil Biology* 57, 13-18.
- 604 Taberlet, P., Prud'homme, S.M., Campione, E., Roy, J., Miquel, C., Shehzad, W., Gielly, L., Rioux, D.,  
605 Choler, P., Clément, J.-C., 2012. Soil sampling and isolation of extracellular DNA from large  
606 amount of starting material suitable for metabarcoding studies. *Molecular Ecology* 21, 1816-  
607 1820.

- 608 Tedersoo, L., Bahram, M., Põlme, S., Kõljalg, U., Yorou, N.S., Wijesundera, R., Ruiz, L.V., Vasco-  
609 Palacios, A.M., Thu, P.Q., Suija, A., 2014. Global diversity and geography of soil fungi. *Science*  
610 346, 1256688.
- 611 Terrat, S., Plassart, P., Bourgeois, E., Ferreira, S., Dequiedt, S., Adele-Dit-De-Renseville, N.,  
612 Lemanceau, P., Bispo, A., Chabbi, A., Maron, P.A., 2015. Meta-barcoded evaluation of the ISO  
613 standard 11063 DNA extraction procedure to characterize soil bacterial and fungal community  
614 diversity and composition. *Microbial Biotechnology* 8, 131-142.
- 615 Thomson, J.A., 2002. An improved non-cryogenic transport and storage preservative facilitating DNA  
616 extraction from 'difficult' plants collected at remote sites. *Telopea* 9, 755-760.
- 617 Valentin, R.E., Fonseca, D.M., Gable, S., Kyle, K.E., Hamilton, G.C., Nielsen, A.L., Lockwood, J.L., 2020.  
618 Moving eDNA surveys onto land: Strategies for active eDNA aggregation to detect invasive forest  
619 insects. *Molecular Ecology Resources*.
- 620 Wang, Q., Song, H., Liu, X., Liu, B., Hu, Z., Liu, G., 2019. Morphology and molecular phylogeny of  
621 coccoid green algae *Coelastrella* sensu lato (Scenedesmaceae, Sphaeropeales), including the  
622 description of three new species and two new varieties. *Journal of Phycology* 55, 1290-1305.
- 623 Weißbecker, C., Buscot, F., Wubet, T., 2017. Preservation of nucleic acids by freeze-drying for next  
624 generation sequencing analyses of soil microbial communities. *Journal of Plant Ecology* 10, 81-  
625 90.
- 626 Widden, P., 1987. Fungal communities in soils along an elevation gradient in northern England.  
627 *Mycologia* 79, 298-309.
- 628 Williams, N., 2020. Fungal DNA and conservation. *Conservation Land Management* 18, 9-15.
- 629

**Table 1.** Storage treatments tested in this study using soil from the Brignant longterm experiment. An \* indicates treatments also tested with soil from the Gogerddan alluvial plain.

| Treatment | Initial Processing       | Duration  | Secondary Processing           | Duration | Final Processing          |
|-----------|--------------------------|-----------|--------------------------------|----------|---------------------------|
| T1*       | Freeze -80°C             |           |                                |          | Freeze Dry                |
| T2        | Freeze -20°C             | Overnight | Thaw. Cold room 4°C closed bag | 14 days  | Freeze -80°C & Freeze Dry |
| T3*       | Freeze -20°C             | Overnight | Thaw. Cold room 4°C closed bag | 5 days   | Freeze -80°C & Freeze Dry |
| T4        | Freeze -20°C             | Overnight | Thaw. RT 23°C closed bag       | 14 days  | Freeze -80°C & Freeze Dry |
| T5        | Cold room 4°C closed bag | 3 days    | RT 23°C active air dry         | 5 days   | Freeze -80°C & Freeze Dry |
| T6*       | Cold room 4°C closed bag | 3 days    | RT 23°C open bag               | 5 days   | Freeze -80°C & Freeze Dry |
| T7        | Cold room 4°C closed bag | 3 days    | Warm dry 37°C open bag         | 5 days   | Freeze -80°C & Freeze Dry |
| T8*       | Cold room 4°C closed bag | 14 days   |                                |          | Freeze -80°C & Freeze Dry |
| T9*       | RT 23°C closed bag       | 14 days   |                                |          | Freeze -80°C & Freeze Dry |
| T10       | RT 23°C closed bag       | 5 days    |                                |          | Freeze -80°C & Freeze Dry |

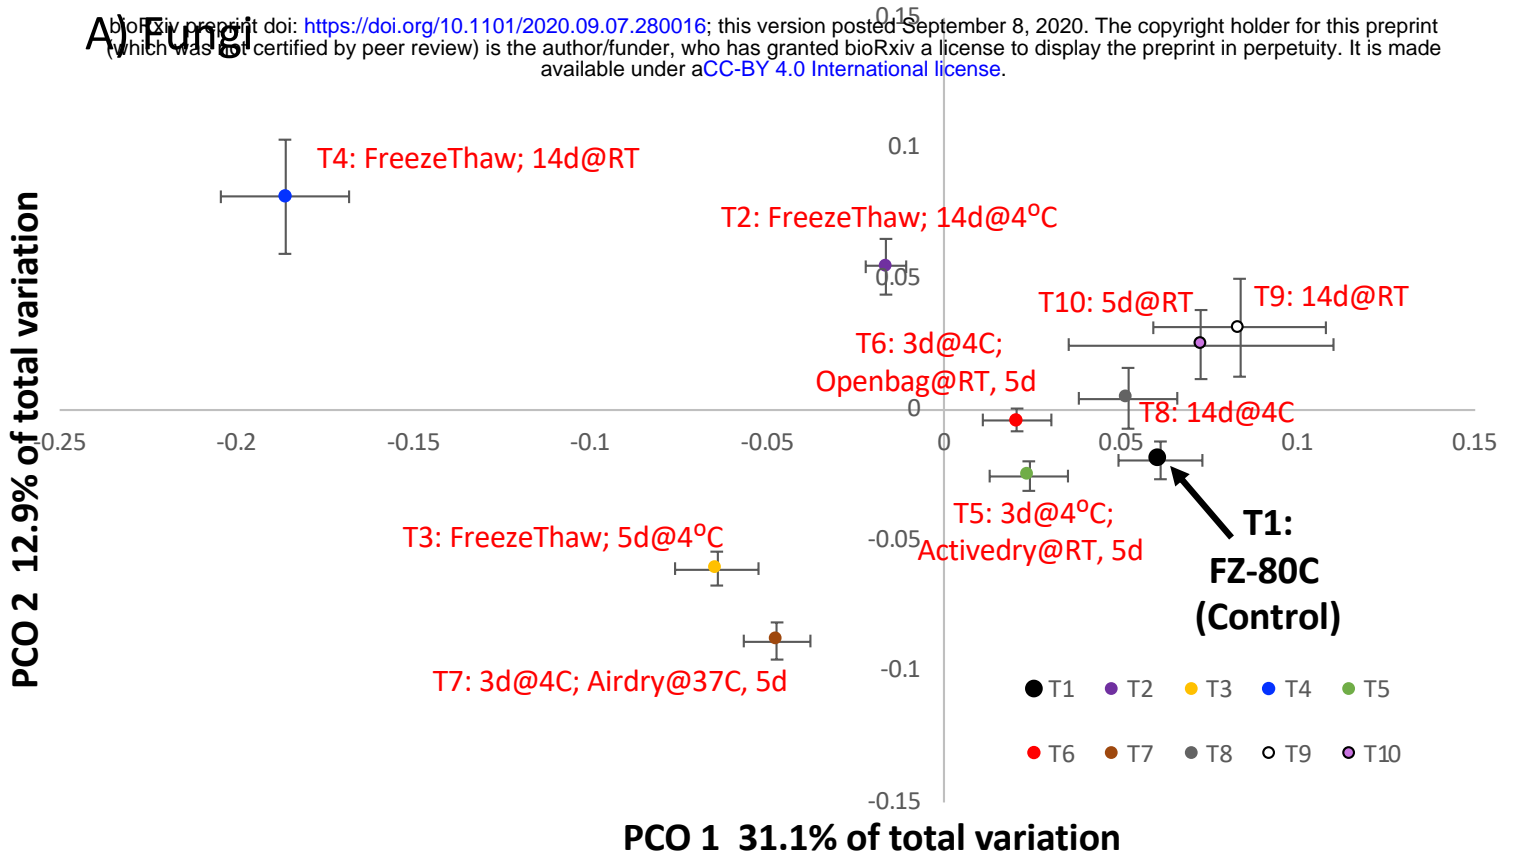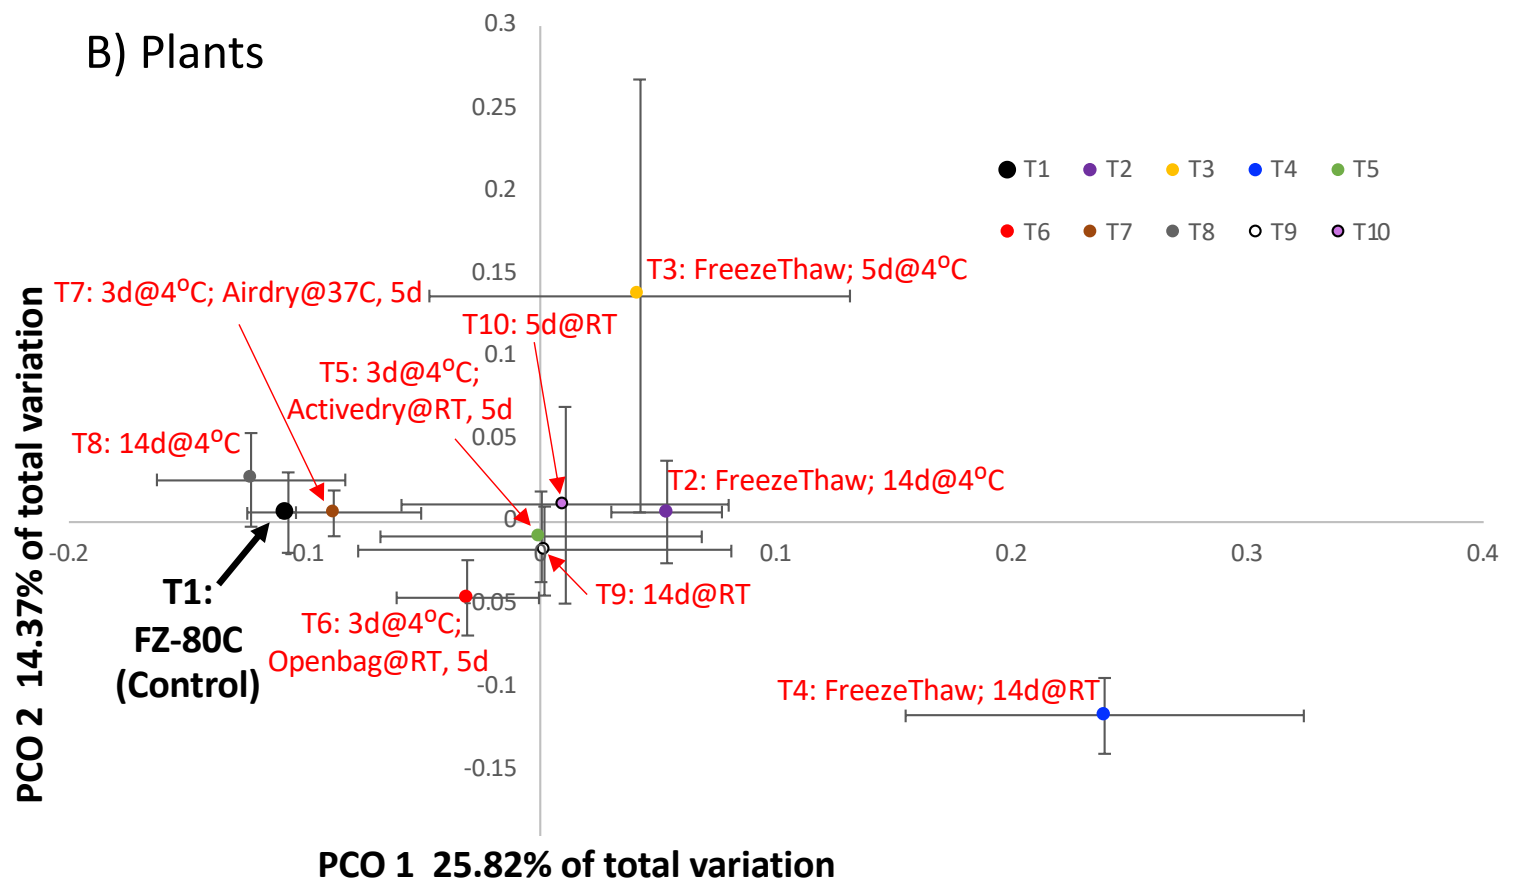

**Fig. 1.** Principal coordinate diagrams of the fungal community data (A) and plant community data (B) in Brignant soil, highlighting the difference in community between the different soil storage treatments. Points show the mean axis scores and error bars indicate standard error of the mean. The control (immediate freezing at -80°C) is indicated with black arrow.

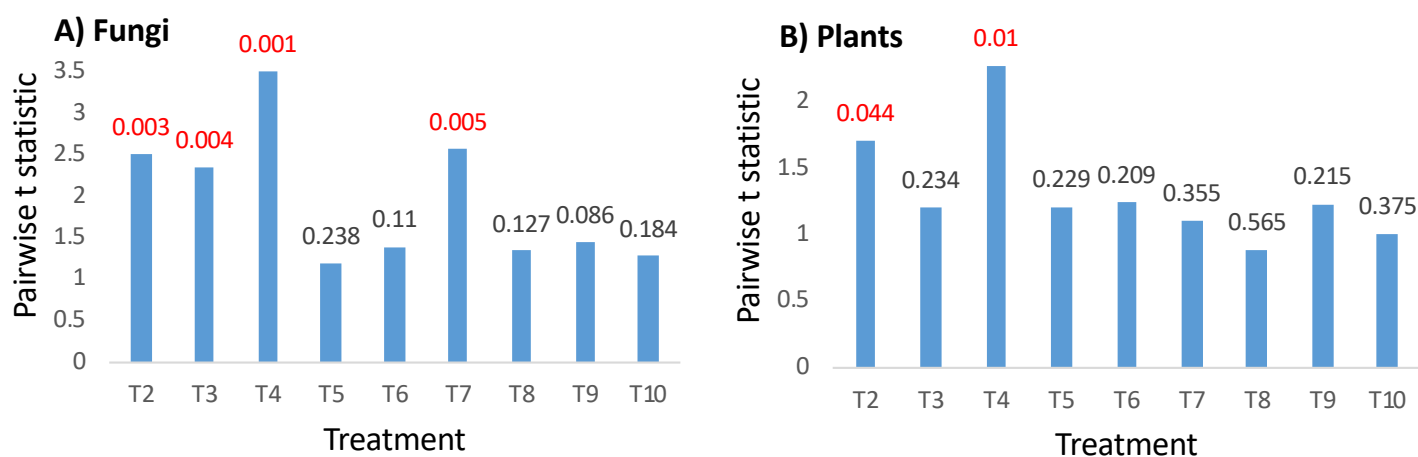

**Fig. 2.** Levels of t-statistic from pairwise Permanova of the control treatment compared to all other treatments (Brignant soil). The p value is shown above the bar with significant ( $P < 0.05$ ) values shown in red. (A) fungal community data (B) plant community data.



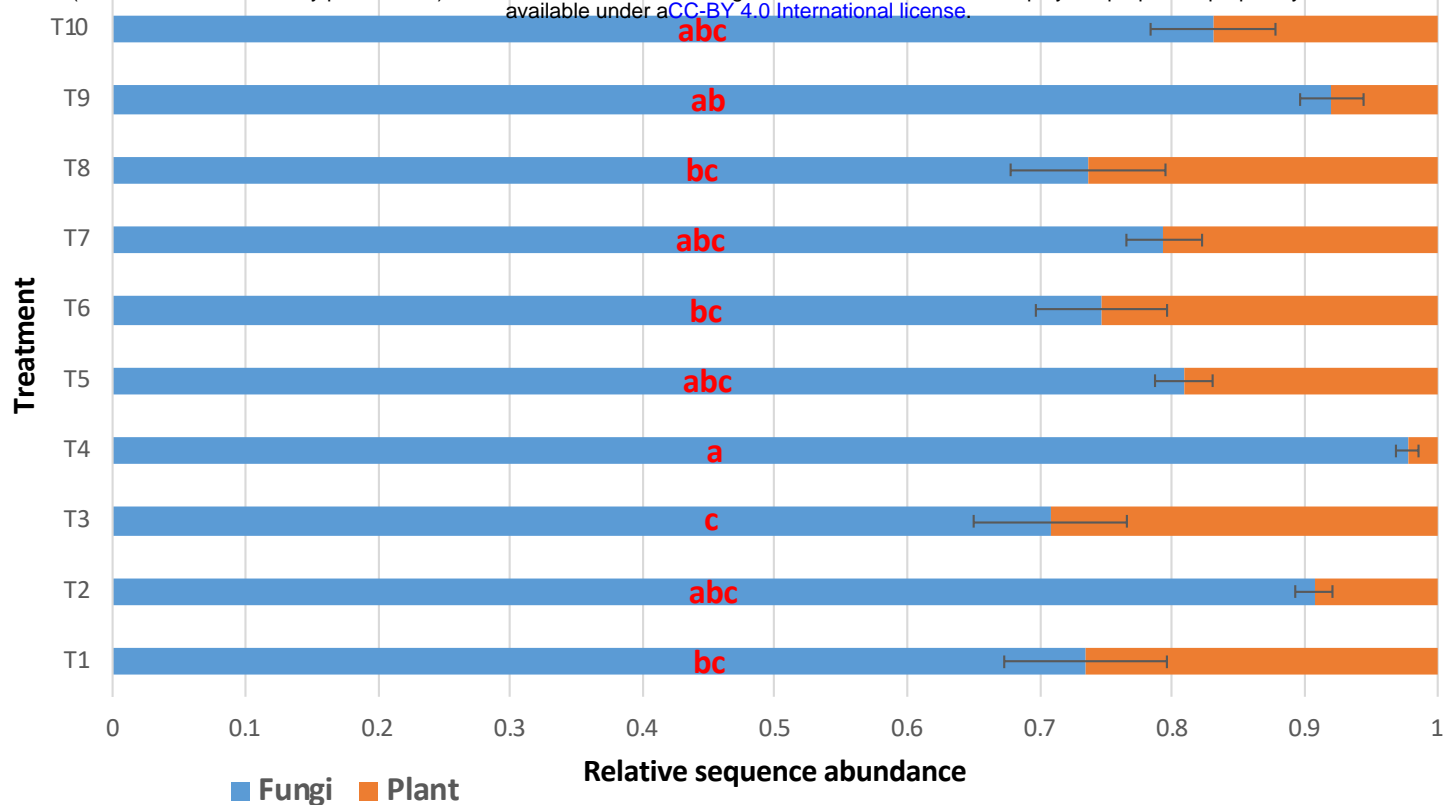

**Fig. 3.** Relative sequence abundance of Fungi to plants by treatment (Brignant soil). Letters on the bars indicate significant groupings as determined by Tukey's HSD post hoc test and error bars show standard error of the mean.

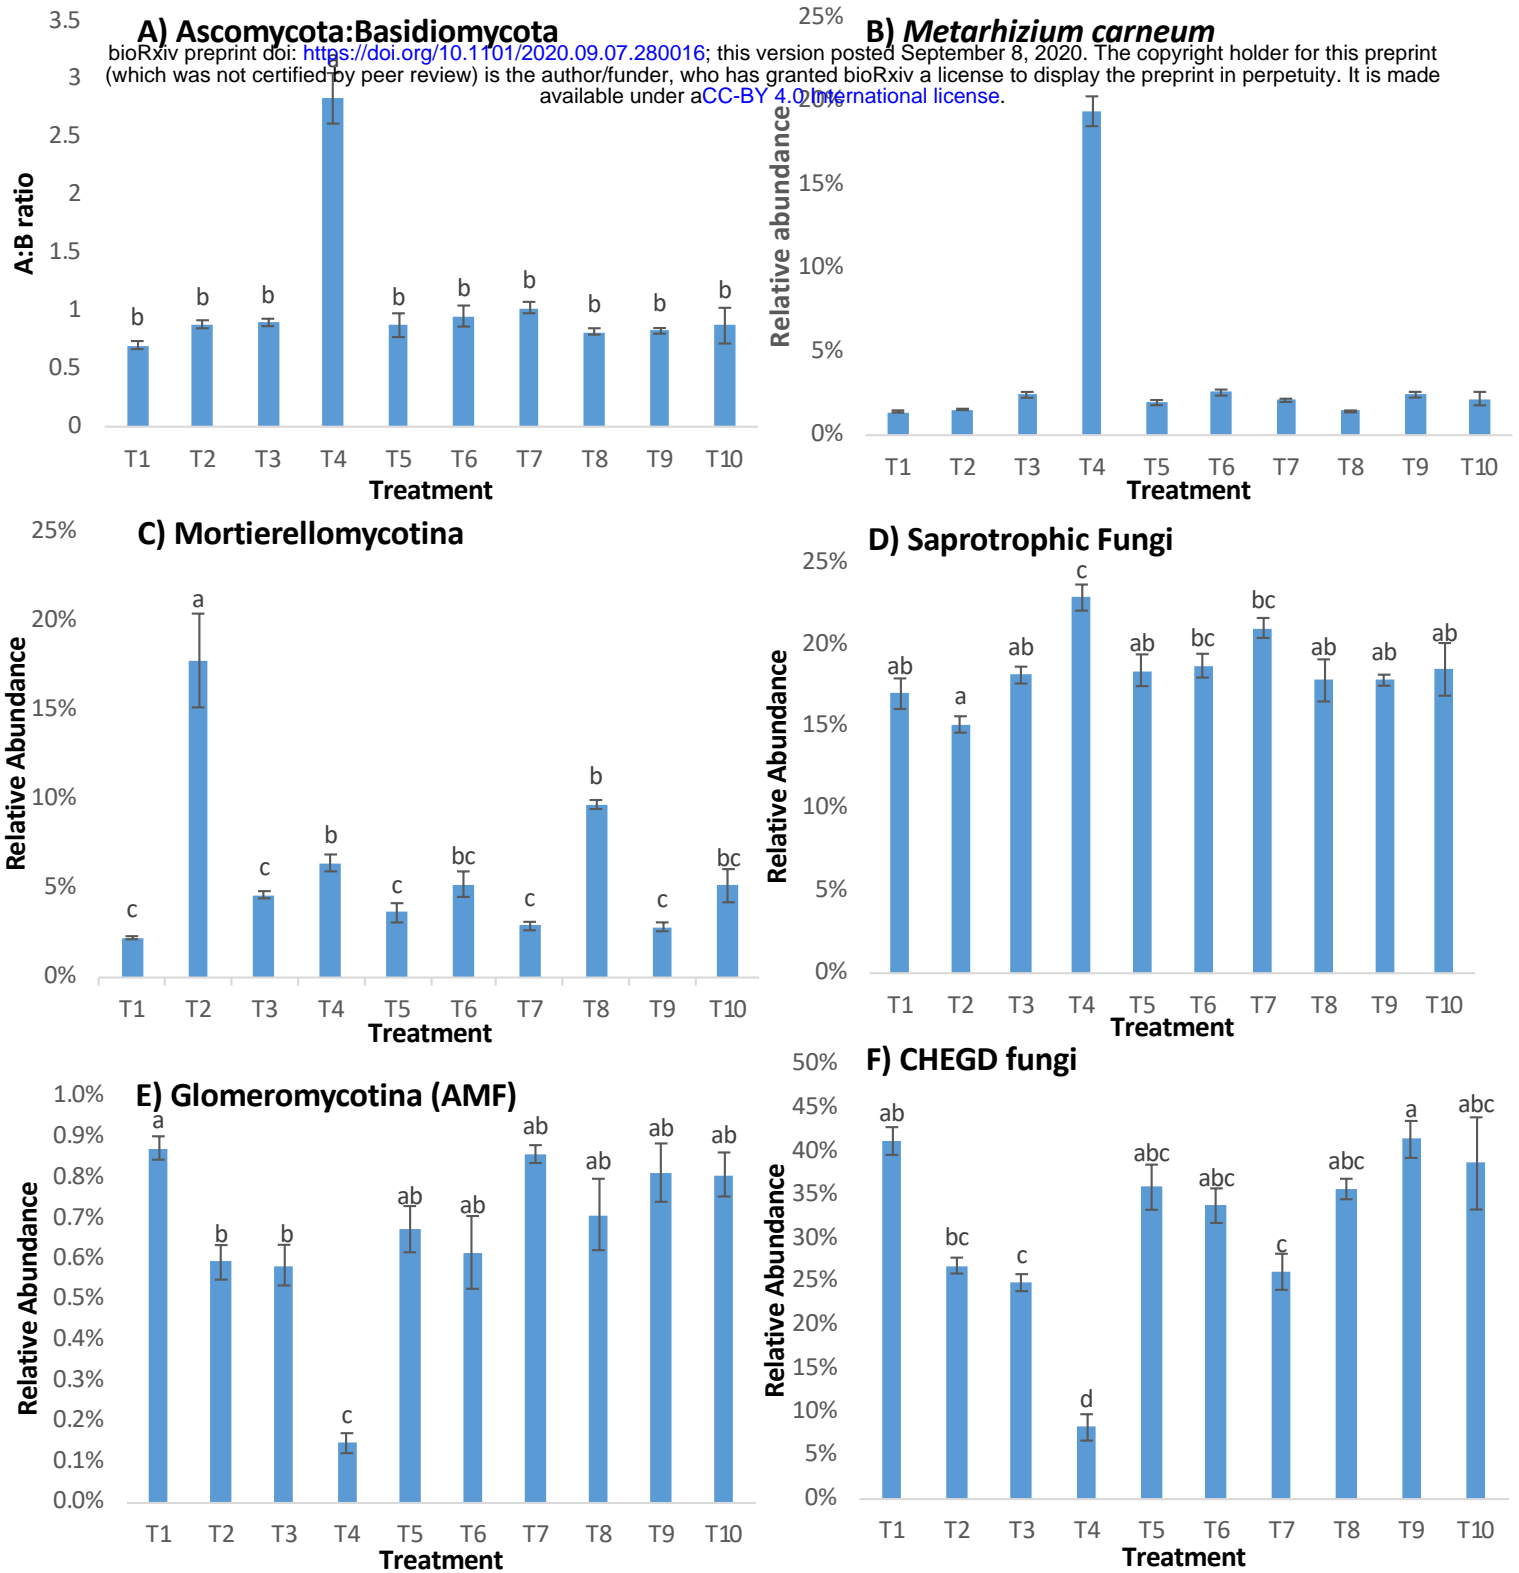

**Fig. 4.** Variations in relative abundance of key fungal groups by storage treatment in Brignant soil. A) Ratio of Ascomycota to Basidiomycota; B) *Metarhizium carneum*; C) Mortierellomycota; D) Saprotrophic fungi; E) Glomeromycotina (Arbuscular mycorrhizal fungi); F) Grassland fungi (CHEGD). Letters above the bars indicate significant groupings as determined by Tukey's HSD post hoc test and error bars show standard error of the mean.

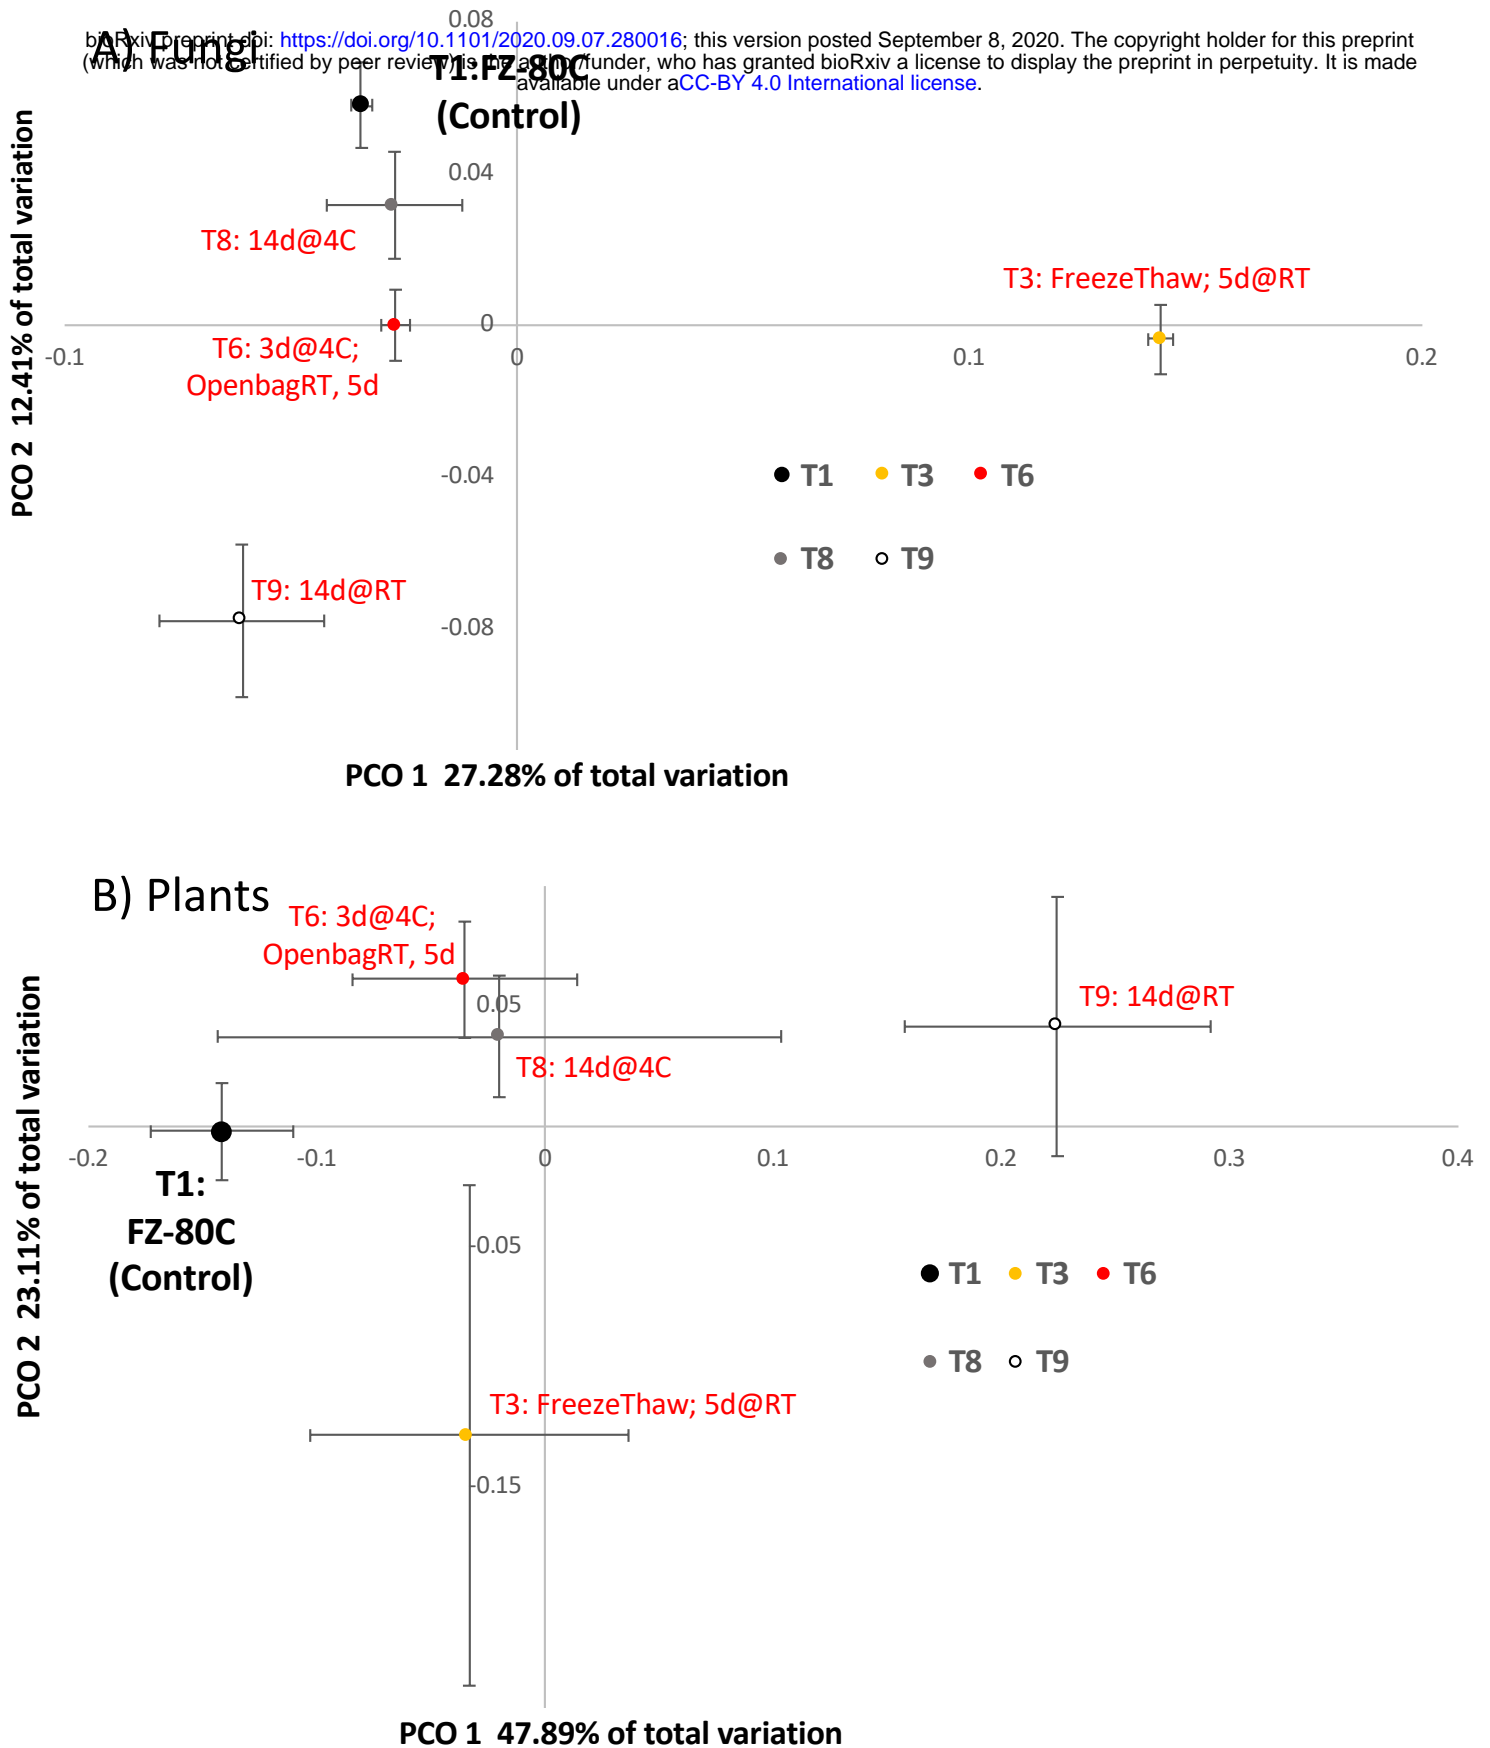

**Fig. 5.** Principal coordinate diagrams of the fungal community data (A) and plant community data (B) in **Gogerddan** soil, highlighting the difference in community between the different soil storage treatments. Points show the mean axis scores and error bars indicate standard error of the mean. The control (immediate freezing at  $-80^{\circ}\text{C}$ ) is indicated with black arrow.
